RESEARCH ARTICLE

# Transcriptome Analysis of Gene Expression during Chinese Water Chestnut Storage Organ Formation

Libao Cheng<sup>1</sup>✉, Shuyan Li<sup>2</sup>✉, Sainan Chen<sup>1</sup>, Yan Wang<sup>1</sup>, Meizhen Yu<sup>1</sup>, Xuehao Chen<sup>1\*</sup>, Liangjun Li<sup>1\*</sup>, Jingjing Yin<sup>1</sup>

**1** School of Horticulture and Plant Protection of Yangzhou University, Yangzhou, Jiangsu 225009, People's Republic of China, **2** Guangling College of Yangzhou University, Yangzhou, Jiangsu 225009, People's Republic of China

✉ These authors contributed equally to this work.

\* [lji@yzu.edu.cn](mailto:lji@yzu.edu.cn) (LL); [xhchen@yzu.edu.cn](mailto:xhchen@yzu.edu.cn) (XC)

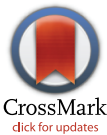

**OPEN ACCESS**

**Citation:** Cheng L, Li S, Chen S, Wang Y, Yu M, Chen X, et al. (2016) Transcriptome Analysis of Gene Expression during Chinese Water Chestnut Storage Organ Formation. PLoS ONE 11(10): e0164223. doi:10.1371/journal.pone.0164223

**Editor:** Yun Zheng, Kunming University of Science and Technology, CHINA

**Received:** May 6, 2016

**Accepted:** September 21, 2016

**Published:** October 7, 2016

**Copyright:** © 2016 Cheng et al. This is an open access article distributed under the terms of the [Creative Commons Attribution License](https://creativecommons.org/licenses/by/4.0/), which permits unrestricted use, distribution, and reproduction in any medium, provided the original author and source are credited.

**Data Availability Statement:** All relevant data are within the paper and its Supporting Information files.

**Funding:** This work was supported by the Natural Science Foundation of Jiangsu Province, China (BK20151307), the Natural Science Fund for Colleges and Universities in Jiangsu Province, China (14KJB210012), the China Postdoctoral Science Foundation funded project (2013M541738) and Interdisciplinary Subject Fund of Yangzhou University, China (jcxk2015-15), and the Science and Technology Support Project of Jiangsu Province (BE2013388). The funders had no

## Abstract

The product organ (storage organ; corm) of the Chinese water chestnut has become a very popular food in Asian countries because of its unique nutritional value. Corm formation is a complex biological process, and extensive whole genome analysis of transcripts during corm development has not been carried out. In this study, four corm libraries at different developmental stages were constructed, and gene expression was identified using a high-throughput tag sequencing technique. Approximately 4.9 million tags were sequenced, and 4,371,386, 4,372,602, 4,782,494, and 5,276,540 clean tags, including 119,676, 110,701, 100,089, and 101,239 distinct tags, respectively, were obtained after removal of low-quality tags from each library. More than 39% of the distinct tags were unambiguous and could be mapped to reference genes, while 40% were unambiguous tag-mapped genes. After mapping their functions in existing databases, a total of 11,592, 10,949, 10,585, and 7,111 genes were annotated from the B1, B2, B3, and B4 libraries, respectively. Analysis of the differentially expressed genes (DEGs) in B1/B2, B2/B3, and B3/B4 libraries showed that most of the DEGs at the B1/B2 stages were involved in carbohydrate and hormone metabolism, while the majority of DEGs were involved in energy metabolism and carbohydrate metabolism at the B2/B3 and B3/B4 stages. All of the upregulated transcription factors and 9 important genes related to product organ formation in the above four stages were also identified. The expression changes of nine of the identified DEGs were validated using a quantitative PCR approach. This study provides a comprehensive understanding of gene expression during corm formation in the Chinese water chestnut.

## Introduction

The Chinese water chestnut belongs to the sedge family, and is widely cultivated throughout the world, including Asia, Australia, Africa, and the Pacific and Indian oceans. It has many

role in study design, data collection and analysis, decision to publish, or preparation of the manuscript.

**Competing Interests:** The authors have declared that no competing interests exist.

uses, such as water purification and embankment protection, and its corms are also edible [1,2,3,4]. Indeed, the water chestnut is a popular aquatic vegetable because of its unique taste and the fact that it is fat-, gluten-, and cholesterol-free. It is also a critical ingredient in traditional Chinese medicine [5].

Similar to other aquatic species, this plant must be maintained in pools, water gardens, tanks, or shallow water tubs in greenhouses during the entire growth season from spring to autumn. It is often asexually propagated by directly planting a corm with a healthy apical bud into wet soil. The corm not only provides nutrition but also serves as an energy unit during the early growth of the plant. In its early developmental stage, buds first form at the end of the main stem, and then develop into stolons. The corms form at the tips of each stolon [6].

The genetic and morphometric processes involved in the formation of storage organs have been extensively studied over past decades [7,8]. Chinese water chestnuts and arrowheads share a similar developmental process in terms of underground stem morphology [9], and corm formation in both species includes an induction stage, an initial swelling stage, and a swelling stage. In the induction stage, rapid radial growth of the stolon tips occurs. In the initial stage, elongation of the stolon is terminated and the tip of the stolon begins to swell. In the swelling stage, the volume of the corm increases and nutrients such as polysaccharides, fats, and proteins are synthesized and deposited [10].

Underground formation of the storage organ can be affected by various internal and environmental factors [11] such as the photoperiod. Storage organ formation of the arrowhead is clearly regulated by the photoperiod, because short days accelerate the process of storage organ formation, whereas long days inhibit it [12]. Perceiving and responding to the photoperiod is the first step for the plant to adjust its growth and developmental processes. The leaf is the main organ that perceives the photoperiod, and the signal is then transferred to the shoot apex through the phloem. The storage organ forms at the tip of the stolon during short days. Phytochrome B (PHYB) is thought to be responsible for photoperiodic responses, and participates in storage organ development during short days. Downregulated PHYB expression leads to the promotion of storage organ formation during short or long days after elimination of the inhibition on tuberization originating from the effect of long days [13]. Flowering locus T (FT), CONSTANS (CO), and GIGANTEA are also involved in photoperiodic regulation during storage organ formation, and the CO/FT module has been shown to be required for the photoperiodic control of tuberization [14,15,16].

The photoperiod shows a relationship with gibberellic acid (GA) to control storage organ formation. Transgenic plants carrying the GA oxidase gene promote underground formation of the storage organ only under conditions of a short-day photoperiod, while earlier formation of storage organs occurs when this enzyme activity is inhibited [17]. During short days, a decrease in the gibberellin content by transgenic StBEL5 and KNOX leads to earlier formation of storage organs [18]. As well as GA, some phytohormones such as cytokinin, jasmonic acid (JA), abscisic acid, indole acetic acid, and ethylene have been identified as being involved in the formation of product organs [19,20,21,22]. For instance, axillary buds decapitated from peas and potatoes were inhibited by the exogenous application of auxin [23]. Ethylene is involved in many plant developmental processes [24,25], including the induction of storage organ formation and root bulking in carrots [26]. JA has also been shown to play an important role in plant biological processes [27]. Several studies have shown that JA has a positive effect on the swelling of underground storage organs. Endogenous JA is believed to be a strong inducer of storage organ development in dicotyledonous potato plants and monocotyledonous yam plants [28]. Moreover, Ravnika et al. (1993) showed that exogenous JA functions in the formation of garlic bulbs [29].

Despite its importance, particularly in south China, few studies have been carried out to investigate underground corm growth of the Chinese water chestnut. Formation of the storage

organ is genetically regulated, but the expression of genes involved in corm formation has not been studied in detail, although work in other species has partially described the above processes, and many storage organ-related genes have been documented [30]. An understanding of the genes expressed during corm formation is necessary to provide insights into the mechanism of corm development, which may lead to better regulation of production in the future.

DNA sequencing is an efficient approach to gain important information on genes, genetic variation, and gene function for biological processes [31,32]. Recently, many critical genes regulating growth and metabolism have been identified using a tag sequencing technique in horticultural plants [33,34]. In the present study, gene expression analysis at the transcriptional level was performed to monitor changes in biological processes during the underground formation of the storage organ [10]. Differentially expressed genes (DEGs) from four developmental stages of the Chinese water chestnut were sequenced and analyzed, with the aim of comprehensively understanding the process of corm formation.

## Materials and Methods

### Plant Materials

'Hongbaoshi', a species of Chinese water chestnut that is widely cultivated in China, was planted in fields at a water depth of 5–10 cm in spring, with average temperatures of 30°C in the day and 20°C at night during the entire growth season. Four or more stolons were observed to develop and elongate in the correct order on each plant. About 90–100 days after plantation, corm formation started at the stolon tips. For tag sequencing and gene expression analysis, corms from the four developmental stages (stolon, initial swelling, middle swelling, and later swelling stage) (S1 Fig) were used (four tips from different plants were combined for each stage). To obtain materials from different developmental stages, water chestnuts were cultivated in a field (non-private) located in southeastern China. Permission for sample collection was granted from the Department of Horticulture of Yangzhou University, China. No specific permissions were required for the location or the field studies because the experiments did not involve any endangered or protected species.

### Screening Differentially Expressed Genes

Corm transcriptomes from the four developmental stages were analyzed. Stolon tips and corms from the initial swelling, middle swelling, and later swelling stages were collected and ground, and RNA was isolated using an RNA extraction mini kit (Qiagen, Hilden, Germany). DNase I was added to eliminate DNA contamination. Sequencing of transcripts in the form of special constructs was completed by the Beijing Institute of Genomics.

To screen the DEGs, transcriptomes from the four stages were analyzed with the aim of tracking major changes in metabolism. DEG libraries of the four samples were determined in parallel using Illumina gene expression sample preparation kits. Briefly, total RNA of these four stages was used for mRNA capture with magnetic oligo(dT) beads. First and second strand cDNA were synthesized, and the bead-bound cDNA was subsequently digested with *Nla*III.

3'-cDNA fragments attached to oligo(dT) beads were ligated to Illumina GEX *Nla*III adapter 1, which contained a recognition site for the endonuclease *Mme*I to enable cleavage 17 bp downstream of the recognition site (CATG) to produce tags with adapter 1. After removing the 3' fragment with magnetic bead precipitation, an Illumina GEX adapter 2 was introduced at the *Mme*I cleavage site. The resulting adapter-ligated cDNA tags were amplified using PCR primers that were annealed to the adaptor ends for 15 cycles.

The 90 bp fragments were sequenced separately at the 3' and 5' ends of the gene (PE90), and the PCR product was recovered and purified from a 6% polyacrylamide Tris-Borate-

EDTA gel. The final quality of the tagged sequences was checked using an Agilent 2100 Bioanalyzer. The four tag libraries constructed underwent Illumina proprietary sequencing for cluster generation through *in situ* amplification, and were deep sequenced using an Illumina Genome Analyzer. For the raw data, we filtered out adaptor sequences, low-quality tags (tags with unknown nucleotides N), empty reads, tags that were too short or too long, and tags with only one copy, to obtain clean tags. The types of clean tags were represented as distinct clean tags. Subsequently, we classified the clean tags and distinct clean tags according to their library copy number, determined their percentage in the total clean and distinct tags, and analyzed the saturation of the four libraries.

Transcriptome *de novo* assembly was carried out with a short read assembling program, Trinity [35]. This is comprised of three independent software modules including inchworm, chrysalis, and butterfly. RNA-seq data were assembled into unique sequences of transcripts for a dominant isoform, then these sequences were partitioned into many individual De Bruijn graphs (each graph represented the transcriptional complexity at a given gene or locus). Unigenes were obtained after each graph was independently processed to extract full-length splicing isoforms and to tease apart transcripts derived from paralogous genes. For annotation, all tags were mapped to the reference sequence from the NCBI database (<http://www.ncbi.nlm.nih.gov/>), and no more than 1 bp of nucleotide mismatch was allowed. The alignment procedures were conducted by following the protocols described in the online documentation (<http://maq.sourceforge.net>) and adopting default parameters. To monitor mapping events on both strands, sense and complementary antisense sequences were included in the mapping process. The tags mapped to reference sequences from multiple genes were filtered. The data sets supporting the results of this article are available in the NCBI database, Submission ID: SUB1471108 and BioProject ID: PRJNA318689, which is available at: <http://www.ncbi.nlm.nih.gov/bioproject/318689>.

## Identification of Differentially Expressed Genes

The transcriptome of the Chinese water chestnut from the four developmental stages was used as a reference for DEG screening and analysis because of the unavailability of existing data. All expressed genes were monitored, and their gene functions were explored using database annotations such as nr, Swiss-Prot, KEGG, and COG, using the criteria of BLASTx alignment (E value < 0.00001) between unigenes and protein databases such as Swiss-Prot, KEGG, and COG. The best aligned results were used to decide the sequence direction and functions of the unigenes.

In case of any conflict between the results from different databases, a priority order of nr, Swiss-Prot, KEGG, and COG was followed when deciding the sequence direction of unigenes. When a unigene aligned with none of the above databases, ESTscan was used to predict its coding region as well as to decide its sequence direction. All of the expressed unigenes were classified according to their functions in metabolic processes. For DEG screening, a false discovery rate (FDR)  $\leq 0.001$  and the absolute value of the  $\log_2$  ratio  $\geq 1$  were used as thresholds to judge the significance of the difference in expression of the unigenes. All DEGs were deposited into the NCBI database under GenBank accessions KX365752 to KX365849.

## Gene Expression Analysis by Quantitative PCR

To study gene expression, the cultivation conditions of the Chinese water chestnut were maintained as described above. Quantitative (q)PCR analysis was performed to quantify the transcriptional level of nine novel genes of the Chinese water chestnut at the stolon stage, initial stage, middle swelling stage, and later swelling stage, to evaluate the results of tag sequencing.

Total RNA was extracted from 100 mg samples of stolon tips and corms at the initial swelling, middle swelling, and later swelling stages using an RNA extraction mini kit (Qiagen). Approximately 10 samples at each stage were pooled. DNase I was used to digest DNA during the RNA extraction process to eliminate DNA contamination. A total of 1–2 µg of RNA was used for cDNA synthesis according to the manufacturer's instructions (Promega, Madison, WI). qPCR was performed with the Mx3000P machine (American, Agilent). SYBR Green Master Mix was used to identify mRNA levels according to the manufacturer's instructions (Tiangen, Beijing, China). According to the sequencing results, primers were designed for genes that showed enhanced transcription during corm formation (S1 Table). β-Actin was used as an internal standard and amplified using the following primers: forward 5'-AACCTCCTCCTCATCGTACT-3', and reverse 5'-GACAGCATCAGCCATGTTCA-3'. Amplification was performed in a 25 µL reaction mixture, containing 12.5 µL SYBR *Premix Ex Taq* II (Tli RNaseH Plus) (2×), 10 µM of each of the forward and reverse primer, 2 µL RT reaction solution (cDNA), and 8.5 µL dH<sub>2</sub>O. The PCR program consisted of 94°C for 30 s, then 40 cycles of 95°C for 5 s and 60°C for 60 s. qPCR reactions were performed in triplicate.

## Results

### Transcriptome Profile during Corm Formation

Four libraries were constructed from the four stages of corm development (the stolon stage, the initial swelling stage, the middle swelling stage, and the swelling stage) using the Illumina sequencing platform, with the aim of identifying genes relevant to corm development in the Chinese water chestnut. The transcriptomes of the four developmental stages of the corm were preprocessed before mapping the tags of each stage. About five million tags were obtained in the B1, B2, B3, and B4 libraries, with 283,469, 245,690, 209,624, and 251,126 distinct tags, respectively. Additionally, 4,371,386, 4,372,602, 4,782,494, and 5,276,540 clean tags were obtained, including 119,676, 110,701, 100,089, and 101,239 distinct clean tags in the B1, B2, B3, and B4 libraries, respectively, after filtering all raw tags with reference sequences. A detailed analysis of the tags in each library is shown in Table 1. We found that the copy distribution of the total and distinct clean tags in the four libraries was similar, with about 5% of distinct clean tags at higher than 100 copies, and about 30% of tags at 5–50 copies. The number of distinct clean tags at between two and five copies (about 60%) was higher than that of other libraries (Fig 1). To evaluate whether the sequenced tags were sufficient to cover the whole transcriptome, analysis of sequencing saturation was also carried out for the four libraries of the different developmental stages. We observed that the number of detected genes increased until the sequencing tags reached approximately four million (S2 Fig), suggesting that the tags identified in each library were sufficient to reflect the entire transcriptional information of the Chinese water chestnut genome.

In total, 38,207 unigenes with an average length of 788 bp were obtained following assembly of these clean tags. Gene functions were identified using BLASTx software by comparison with the existing NCBI database, using a cut-off E value of 10<sup>-5</sup>. Of these, about 40% of all distinct sequences in the four libraries showed an above cut-off BLAST result, and about 60% did not match with known genes. All matched genes were grouped into 26 catalogues according to their annotated functions. We found that the function of catalogue with the largest number of genes was predicted, and the group with the smallest number of genes was relevant to extracellular structure (S3 Fig). The DEGs were also classified into three categories according to their function: biological process, cellular component, and molecular function. We found that the DEGs (from stolon stage to late swelling stage) were involved in various metabolisms. The number of genes in the biological process category related to cellular process and metabolism



**Table 1. Categorization and abundance of tags.**

|                                 |                                      | B1      | B2      | B3      | B4      |
|---------------------------------|--------------------------------------|---------|---------|---------|---------|
| Raw Tag                         | Total number                         | 4728376 | 4716581 | 4969688 | 4427680 |
|                                 | Distinct Tag                         | 283469  | 245690  | 209624  | 251126  |
| Clean Tag                       | Total number                         | 4371386 | 4372602 | 4782494 | 5276540 |
|                                 | Distinct Tag number                  | 119676  | 110701  | 100089  | 101239  |
| All Tag Mapping to Gene         | Total number                         | 3147933 | 3200198 | 3905586 | 4571911 |
|                                 | Total percentage of clean tag        | 72.01%  | 73.19%  | 81.66%  | 86.65%  |
|                                 | Distinct Tag number                  | 59110   | 55905   | 53726   | 59622   |
|                                 | Distinct Tag percentage of clean tag | 49.39%  | 50.50%  | 53.68%  | 57.81%  |
| Unambiguous Tag Mapping to Gene | Total number                         | 2348643 | 2114294 | 1926958 | 795588  |
|                                 | Total percentage of clean tag        | 53.73%  | 48.35%  | 40.29%  | 45.08%  |
|                                 | Distinct Tag number                  | 47086   | 44427   | 42461   | 46419   |
|                                 | Distinct Tag percentage of clean tag | 39.34%  | 40.13%  | 42.42%  | 45.71%  |
| All Tag-mapped Genes            | Total number                         | 20222   | 19877   | 19518   | 15486   |
|                                 | Percentage of reference genes        | 52.93%  | 52.02%  | 51.08%  | 40.53%  |
| Unambiguous Tag-mapped Genes    | Total number                         | 14920   | 14581   | 14260   | 10706   |
|                                 | Percentage of reference genes        | 39.05%  | 38.16%  | 37.32%  | 28.02%  |
| Unknown Tag                     | Total number                         | 1223453 | 1172404 | 876908  | 704629  |
|                                 | Total percentage of clean tag        | 27.99%  | 26.81%  | 18.34%  | 13.35%  |
|                                 | Distinct Tag number                  | 60566   | 54796   | 46363   | 41617   |
|                                 | Distinct Tag percentage of clean tag | 50.61%  | 49.50%  | 46.32%  | 42.19%  |

doi:10.1371/journal.pone.0164223.t001

process was greater than for other processes. It was also shown that most genes in the cellular component were involved in cell, cell junction, organelle, organelle part, and membrane functions. For molecular function, many genes participated in binding, catalytic activity, and transport activity (S4 Fig).

### Differentially Expressed Genes in the Four Stages of Corm Formation

**Changes in gene expression during corm formation.** To monitor the changes in gene expression, four libraries at different developmental stages of the corm were constructed. A total of 11,592, 10,949, 10,585, and 7,111 transcripts were identified from the B1, B2, B3, and B4 libraries, respectively. Of these, 9,567, 8,921, and 6,445 genes were similarly expressed in the B1/B2, B2/B3, and B3/B4 stages, respectively (Fig 2 and S2 Table). Within these four libraries, we also found a large number of genes that changed expression during corm development, suggesting that the storage organ formation process is highly complex at the molecular level. The number of genes per million clean tags was used to evaluate the abundance of transcripts in the four libraries.

In the B1/B2 stages, 1,027 genes changed expression; of these, the expression of 315 genes was enhanced and that of 712 genes was decreased. In the B2/B3 stages, 182 genes were identified as upregulated and 1,014 were downregulated. In the B3/B4 stages, we observed enhanced expression of 106 genes and decreased expression of 3,213 genes. In summary, the number of transcripts in the B1/B2 libraries showed a smaller change compared with the B1/B4 libraries, indicating that the development of the corm from the stolon stage to the initial swelling stage differs from that from the initial swelling stage to the swelling stage (Table 2).

**Differentially expressed genes at each stage.** During corm development of the Chinese water chestnut, we found that a large number of genes altered their expression at the B1/B2,

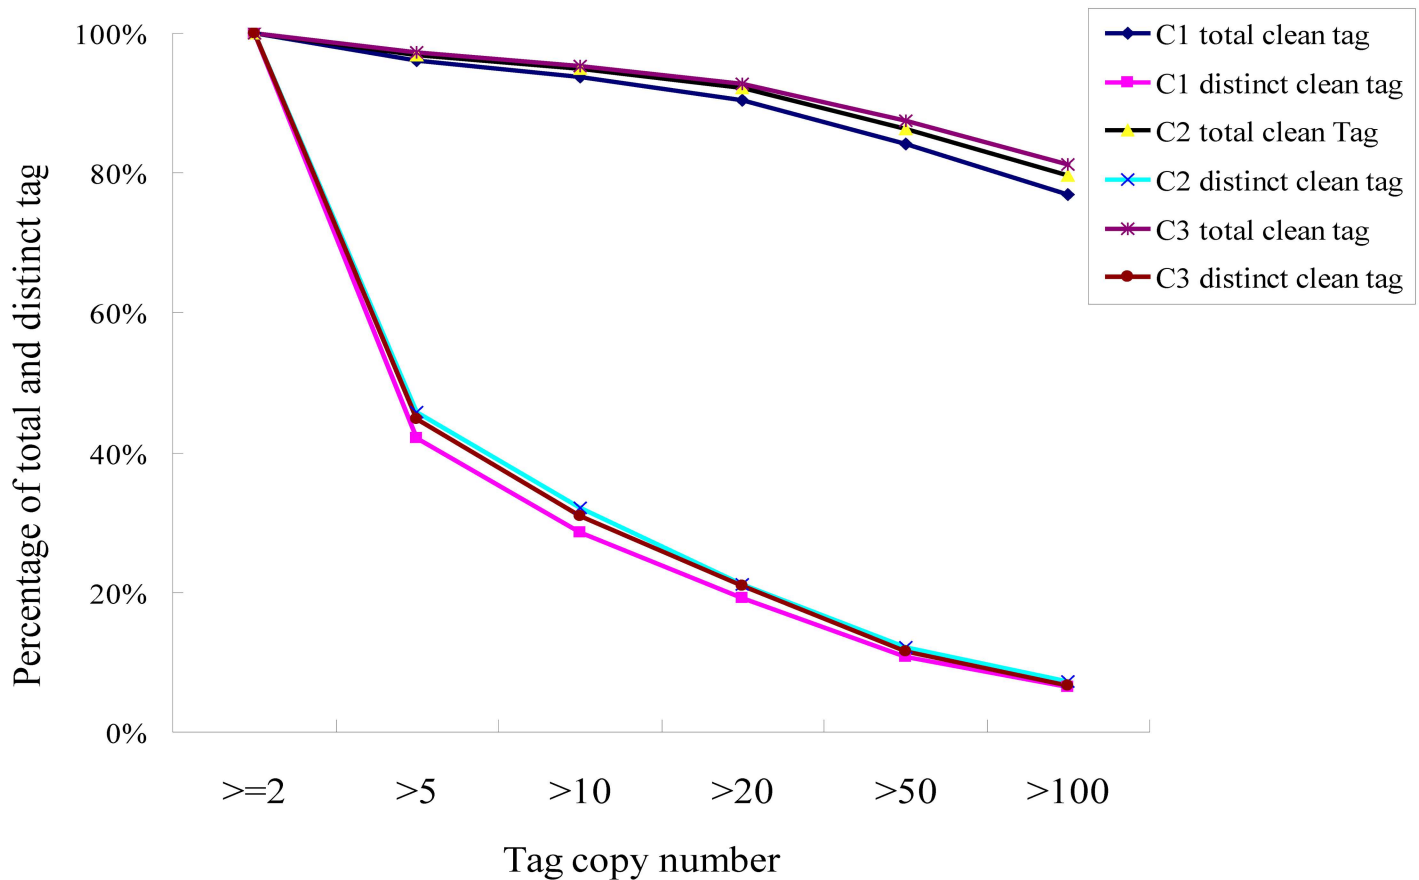

**Fig 1. Distribution of the total clean tags and the distinct clean tags from the four libraries.**

doi:10.1371/journal.pone.0164223.g001

B2/B3, and B3/B4 stages. Therefore, 20 DEGs showing high levels of change were selected at the B1/B2, B2/B3, and B3/B4 stages to monitor the metabolic process during corm formation.

We observed that two types of hormone, indole acetic acid (indole-3-acetic acid-amido synthetase) and gibberellin (gibberellin 20-oxidase), were involved in the process from the stolon stage to the initial formation stage. A cation/calcium exchanger showed enhanced expression during this period, suggesting that  $Ca^{2+}$  has a close relationship with corm formation. We also found increased expression of malic enzyme participating in energy metabolism. In the B2/B3 libraries, two genes were involved in storage metabolism: the glutathione s-transferase gene and the soluble starch synthase gene. We also found altered expression of extensin protein, which is related to corm swelling. Some genes such as calmodulin-like protein and calcium-dependent protein kinase involved in  $Ca^{2+}$  signal regulation demonstrated increased transcriptional levels from the initial swelling stage to the middle swelling stage. In the B3/B4 libraries, we found that four genes showed enhanced expression, glutathione s-transferase, starch branching enzyme, aldose reductase-related protein, and proline-rich receptor-like protein kinase, which are involved in substance metabolism. Two genes, ATPase and NADP-dependent malic enzyme, relevant to energy metabolism also showed increased transcriptional levels (Table 3).

We also identified the expression of all transcription factors during corm formation. We found that 15, 16, and eight transcription factors were upregulated in the B1/B2, B2/B3, and B3/B4 stages, respectively (Table 4). In the B1/B2 stages, two of the transcription factors were

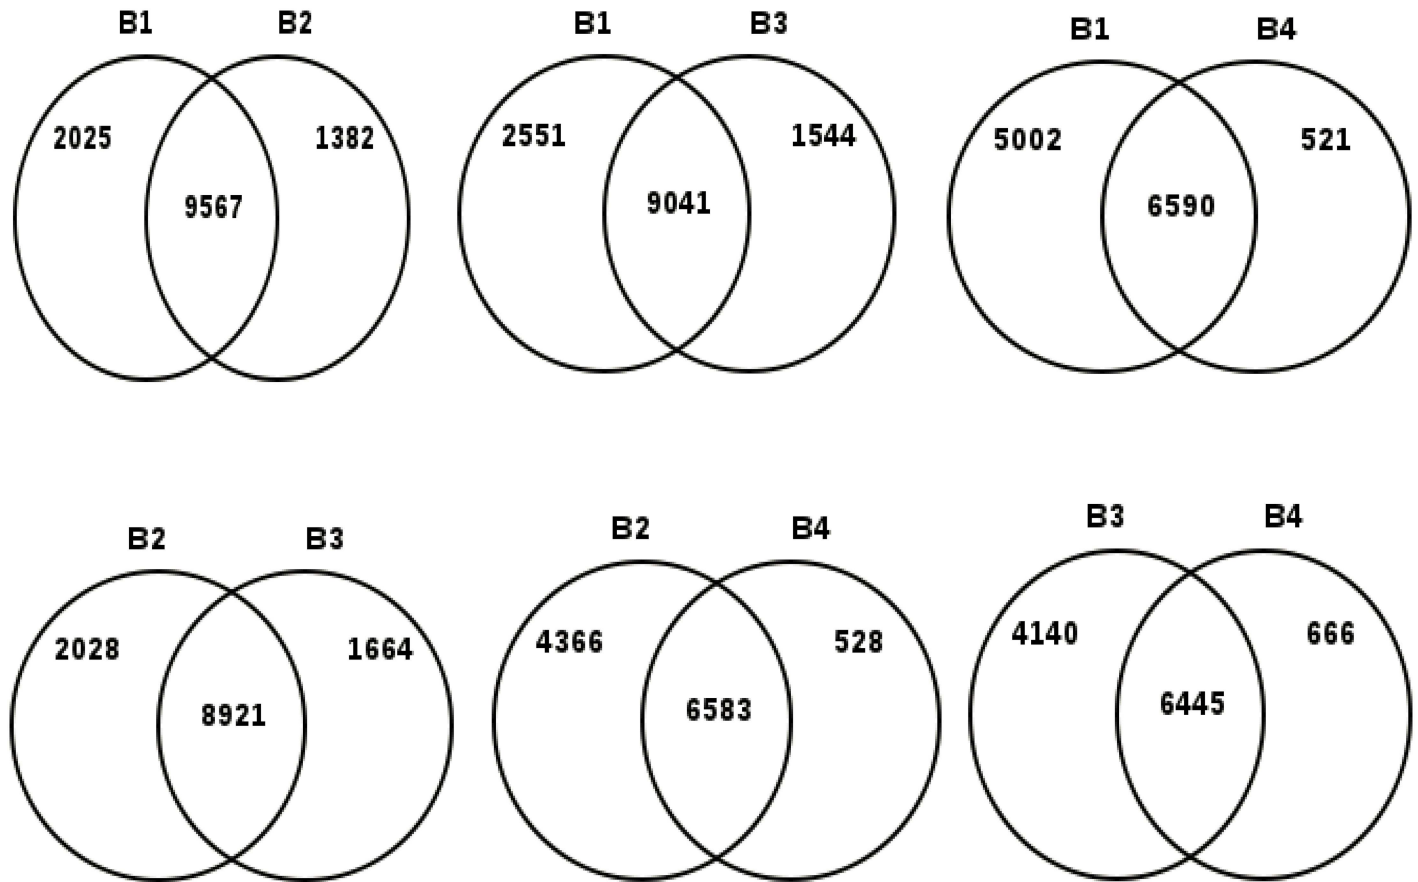

**Fig 2. Analysis of tag-mapped genes of the four corm developmental stages in the Chinese water chestnut.**

doi:10.1371/journal.pone.0164223.g002

ethylene-responsive factors (ethylene-responsive transcription factor 9 and AP2 transcription factor), which indicated that ethylene plays an important role from the stolon stage to the initial swelling stage. The expression of some important transcription factors, such as bZIP transcription factor ABI5, WRKY, MYB, and MYC was also found to increase during this period. In the B2/B3 stages, aside from ethylene-responsive factors (ethylene-responsive transcription factor CRF4, AP2 domain class transcription factor, and ethylene-responsive transcription factor 1A), we observed that the expression of CaM-binding transcription factors was also increased. The extensin gene, related to corm swelling, increased its transcriptional level during the initial swelling stage to the middle swelling stage. In the B3/B4 stages, three transcription factors (ERF1 transcription factor, ethylene-responsive transcription factor 5-like, and ethylene-responsive transcription factor 4), involved in ethylene signal transduction, were increased.

**Table 2. DEGs across all libraries.** All genes mapped to the reference sequence and genome sequences were examined for their expression differences across different libraries. The numbers of differentially expressed genes represent transcripts, using threshold values of FDR  $\leq 0.001$  and  $\log_2$  ratio  $\geq 1$  for controlling false discovery rates. B1, B2, B3, and B4 represent the samples that were collected at the stolon stage, the initial swelling stage, the middle swelling stage, and the later swelling stage of the corm, respectively.

|                | B1:B2 | B1:B3 | B1:B4 | B2:B3 | B2:B4 | B3:B4 |
|----------------|-------|-------|-------|-------|-------|-------|
| Total          | 1027  | 2294  | 4933  | 1196  | 4099  | 3319  |
| Up-regulated   | 315   | 417   | 145   | 182   | 61    | 106   |
| Down-regulated | 712   | 1877  | 4788  | 1014  | 4038  | 3213  |

doi:10.1371/journal.pone.0164223.t002



**Table 3. The 20 most differentially expressed annotated genes in the B1/B2, B2/B3, and B3/B4 libraries, based on expressed tag frequency.**

| Gene ID         | Abundant (TMP ratio) | P-Value  | FDR     | Function annotation                                      |
|-----------------|----------------------|----------|---------|----------------------------------------------------------|
| In B1/B2 stages |                      |          |         |                                                          |
| B4958           | 10.13                | 0        | 0       | Putative zinc finger protein                             |
| B512            | 9.84                 | 0        | 0       | Glycine-rich Cell wall protein                           |
| B8571           | 9.10                 | 0        | 0       | Cytochrome P450 monooxygenase CYP706A12                  |
| B4367           | 7.10                 | 0        | 0       | Cation/Calcium exchanger 3-like                          |
| B9242           | 6.51                 | 0        | 0       | Malic enzyme                                             |
| B1629           | 8.21                 | 0        | 0       | Pathogenesis-related protein 10a                         |
| B9067           | 8.10                 | 0        | 0       | Carotenoid cleavage dioxygenase 4, Chloroplastic-like3   |
| B5444           | 8.10                 | 0        | 0       | Peroxidase 72 precursor                                  |
| B16992          | 8.0                  | 0        | 0.00098 | Protein VAC14 homolog                                    |
| B3517           | 7.98                 | 0.000018 | 0.00071 | Granule-bound starch synthase                            |
| B7629           | 7.84                 | 0.0012   | 0.00118 | indole-3-acetic acid-amido synthetase                    |
| B5325           | 7.84                 | 0.000057 | 0.00447 | Auxin efflux carrier component 4-like                    |
| B4260           | 7.67                 | 0.000089 | 0.00124 | Plant synaptotagmin                                      |
| B9579           | 7.52                 | 0.0088   | 0.00168 | Bzip Transcription factor ABI5                           |
| B3968           | 7.32                 | 0.0041   | 0.00478 | Nodule protein Dg93-like protein                         |
| B15737          | 7.10                 | 0.00058  | 0.00065 | Gibberellin 20 oxidase                                   |
| B1046           | 7.10                 | 0.000007 | 0.0078  | Jacalin-like lectin domain containing protein            |
| B9809           | 7.09                 | 0.000078 | 0.00045 | Exportin-T-like                                          |
| B4439           | 7.09                 | 0.000787 | 0.0089  | ATP phosphoribosyl transferase-like                      |
| B13033          | 7.00                 | 0.00897  | 0.00513 | Helicase                                                 |
| In B2/B3 stages |                      |          |         |                                                          |
| B6413           | 11.23                | 0        | 0       | BTB/POZ and MATH domain-containing protein 2-like        |
| B3872           | 11.12                | 0        | 0       | Protein cornichon homolog 1-like                         |
| B7997           | 10.9                 | 0        | 0       | RNA polymerase beta'' subunit, partial                   |
| B1399           | 10.88                | 0        | 0       | Pathogenesis-related transcriptional activator PT16      |
| B5860           | 10.58                | 0        | 0       | F-box/kelch-repeat protein At5g42350-like                |
| B1587           | 10.34                | 0        | 0       | Two-component response regulator ARR9-like               |
| B2484           | 10.02                | 0        | 0       | Calcium dependent protein kinase                         |
| B3579           | 9.85                 | 0        | 00.0008 | Extensin                                                 |
| B12950          | 9.80                 | 0.00072  | 0       | Auxin-responsive family protein                          |
| B9404           | 9.75                 | 0.00007  | 0.00007 | Transcriptional corepressor LEUNIG-like                  |
| B2331           | 9.56                 | 0.000071 | 0.00005 | E3 ubiquitin protein ligase RIE1-like                    |
| B13803          | 9.10                 | 0.000001 | 0.00004 | Cyclin-dependent kinase inhibitor 1-like                 |
| B18064          | 8.54                 | 0.000487 | 0.00001 | Calmodulin-like protein                                  |
| B18107          | 7.06                 | 0.00054  | 0.00047 | Soluble starch synthase                                  |
| B5513           | 7.05                 | 0.000824 | 0.00471 | NAC protein 1                                            |
| B15529          | 6.89                 | 0.000004 | 0.00015 | Malic acid transport protein                             |
| B6456           | 6.65                 | 0.002528 | 0.00987 | NA-directed RNA polymerase II 135 kDa polypeptid         |
| B1561           | 5.89                 | 0.000006 | 0.00001 | Aldo-keto reductase family 1, member B1                  |
| B3517           | 5.68                 | 0.000212 | 0.00156 | Granule-bound starch synthase                            |
| B17903          | 5.28                 | 0.00009  | 0.00004 | Cellulose synthase BoclesA1                              |
| In B3/B4 stages |                      |          |         |                                                          |
| B6425           | 12.58                | 0        | 0       | Multiprotein-bridging factor                             |
| B11692          | 12.41                | 0        | 0       | Altered inheritance rate of mitochondria protein 25-like |
| B5552           | 11.87                | 0        | 0       | Cytochrome P450                                          |
| B15917          | 11.25                | 0        | 0       | Heat shock protein                                       |

(Continued)

Table 3. (Continued)

| Gene ID | Abundant (TMP ratio) | P-Value  | FDR     | Function annotation                                |
|---------|----------------------|----------|---------|----------------------------------------------------|
| B9585   | 10.69                | 0        | 0       | ATPase                                             |
| B12136  | 10.58                | 0        | 0       | Aldose reductase-related protein                   |
| B4846   | 10.25                | 0        | 0       | Metallothionein-like                               |
| B13146  | 10.02                | 0        | 0       | Alanine—tRNA ligase                                |
| B18689  | 9.98                 | 0        | 0.0047  | NADP-dependent alkenal double bond reductase P2    |
| B15946  | 9.87                 | 0.000007 | 0.00002 | Anthocyanidin 5,3-O-glucosyltransferase-like       |
| B6311   | 9.48                 | 0.000878 | 0.00047 | Glutathione S-transferase                          |
| B3976   | 9.25                 | 0.000045 | 0.00041 | Starch branching enzyme                            |
| B11531  | 8.45                 | 0.000001 | 0.00787 | Mitotic checkpoint serine/threonine-protein kinase |
| B8401   | 8.01                 | 0.000147 | 0.00001 | Proline-rich receptor-like protein kinase          |
| B16616  | 7.88                 | 0.00074  | 0.00065 | NADP-dependent malic enzyme                        |
| B16477  | 7.58                 | 0.00064  | 0.00001 | Shaggy-related protein kinase                      |
| B4000   | 7.14                 | 0.000077 | 0.00004 | Cytochrome P450 CYP84A33                           |
| B8396   | 6.25                 | 0.000877 | 0.00047 | Transcriptional regulator ATRX-like                |
| B7345   | 6.24                 | 0.000044 | 0.00001 | ABA response element binding factor                |
| B6184   | 5.21                 | 0.000245 | 0.00071 | Ferritin                                           |

doi:10.1371/journal.pone.0164223.t003

Additionally, bZIP transcription factor ABI5, transcription factor HBP-1a(c14), and heat shock transcription factor A2 showed enhanced expression during the middle swelling stage to the swelling stage. These gene expression data show that the ethylene signal transduction pathway plays a critical role throughout the entire period of corm formation.

**Expression profiling of genes related to corm formation.** RNA sequencing data were compared with previous reports to identify whether our expression model had coverage of well-defined genes. Expression profiling showed that 10 genes were related to corm formation. Detailed expression data of these genes and the biological processes involved in plant metabolism are listed in Table 5. We found that five genes, GIGANTEA, FRUITFUL-like protein, Cycling Dof Factor, BEL1-like HD transcription factor, and Lipoxygenase, showed increased expression during corm swelling, while five were downregulated: zinc finger CONSTANS-like protein, MADS-box transcription factor, SFT family, sucrose synthase, and phytochrome B.

**qPCR gene expression analysis.** To further monitor gene expression profiling, nine genes related to corm formation, including zinc finger protein CONSTANS-LIKE, GIGANTEA-like protein, MADS-box transcription factor, SFT2 transport protein, dof zinc finger protein DOF1.7, sucrose synthase, lipoxygenase, FRUITFUL-like protein, and BEL1-like HD transcription factor, underwent qPCR analysis of transcriptional levels. A similar gene expression pattern was observed for seven of the genes by qPCR and tag sequencing methods during corm formation, suggesting that the results of the two techniques correlate with each other. Only one gene showed a difference in expression by the qPCR technique compared with the tag sequencing analysis (Fig 3).

## Discussion

The high-throughput tag sequencing technique is an effective approach for monitoring gene expression of the whole plant genome, and many metabolic mechanisms have been identified using this method [34,43]. It was previously demonstrated that storage organ formation is regulated by both genetic and environmental factors [15]. In this study, approximately five million tags were identified at the stolon stage, initial stage, middle swelling stage, and later swelling

stage (B1, B2, B3, and B4), with 283,469, 245,690, 209,624, and 251,126 distinct tags, respectively. However, only 52.93%, 52.02%, 51.08%, and 40.53% of genes at the four stages were mapped to reference genes because of the unavailability of a complete genome of the Chinese water chestnut (Tables 1 and 2).

**Table 4. Expression abundance of some corm formation-related genes identified previously.** TMP, transcripts per million clean tags.

| Gene ID                | P-Value    | Function annotation (species)                                             |
|------------------------|------------|---------------------------------------------------------------------------|
| <b>B1/B2 libraries</b> |            |                                                                           |
| B9579                  | 0.00391    | bZIP transcription factor ABI5 [Zea mays]                                 |
| B7116                  | 0.00625    | GATA transcription factor [Ricinus communis]                              |
| B8501                  | 0.00761    | MYB transcription factor MYB17 [Saccharum]                                |
| B166                   | 0.0178     | WRKY protein [Cucumis sativus]                                            |
| B13196                 | 0.01537    | EIL transcription factor [Zea mays]                                       |
| B8590                  | 0.0539     | Transcription factor ATR2-like [Glycine max]                              |
| B13714                 | 0.01250    | PHD finger transcription facto [Zea mays]                                 |
| B4287                  | 0.05680    | Zinc finger CCCH domain-containing protein 9 [Brachypodium distachyon]    |
| B9031                  | 0.6587     | Trihelix transcription factor GT-2-like [Glycine max]                     |
| B2726                  | 0.00       | NAC domain protein, IPR003441 [Populus trichocarpa]                       |
| B12350                 | 0.0250     | MIXTA-like transcription factor [Lotus japonicus]                         |
| B16223                 | 0.02500    | Heat shock transcription factor [Cenchrus americanus]                     |
| B1203                  | 0.0280     | AP2 transcription factor [Triticum aestivum]                              |
| B490                   | 0.000902   | Ethylene-responsive transcription factor 9 [Glycine max]                  |
| B16370                 | 0.02670    | Transcription factor MYC2-like [Vitis vinifera]                           |
| <b>B2/B3 libraries</b> |            |                                                                           |
| B13987                 | 0.04060    | Trihelix transcription factor GT-1 isoform 1 [Vitis vinifera]             |
| B3355                  | 0.07780    | Ethylene-responsive transcription factor CRF4 [Brachypodium distachyon]   |
| B413                   | 0.07780    | Scarecrow-like transcription factor PAT1-like [Vitis vinifera]            |
| B6370                  | 0.01480    | Homeobox protein HD1 [Zea mays]                                           |
| B8911                  | 0.01480    | Myb-related protein 306 [Brachypodium distachyon]                         |
| B8517                  | 0.01480    | Transcription factor HBP-1b [Brachypodium distachyon]                     |
| B16129                 | 0.0284     | GRAS family transcription factor [Populus trichocarpa]                    |
| B7244                  | 0.0274     | Transcription factor PIF5-like [Glycine max]                              |
| B2141                  | 0.0547     | GATA transcription factor 26-like [Glycine max]                           |
| B2733                  | 0.285      | MADS box transcription factor [Elaeis guineensis]                         |
| B7071                  | 0.0036     | AP2 domain class transcription factor [Malus x domestica]                 |
| B40                    | 0.00487    | CaM-binding transcription factor [Oryza sativa]                           |
| B5637                  | 0.0006     | Transcription factor PIF5-like [Vitis vinifera]                           |
| B166                   | 0.0128061  | WRKY protein [Cucumis sativus]                                            |
| B3407                  | 0.039235   | Ethylene-responsive transcription factor 1A [Medicago truncatula]         |
| B1381                  | 0.0035191  | General transcription factor IIH subunit 2-like [Brachypodium distachyon] |
| <b>B3/B4 libraries</b> |            |                                                                           |
| B6147                  | 1.81E-05   | Heat shock transcription factor A2 [Vitis vinifera]                       |
| B7672                  | 0.011465   | ERF1 transcription factor [Vitis pseudoreticulata]                        |
| B7672                  | 0.041667   | Ethylene-responsive transcription factor 5-like [Vitis vinifera]          |
| B8590                  | 0.1389     | Transcription factor BHLH6 [Arabidopsis thaliana]                         |
| B9579                  | 0.0156     | bZIP transcription factor ABI5 [Zea mays]                                 |
| B13684                 | 0.0151426  | Transcription factor HBP-1a(c14) [Triticum aestivum]                      |
| B8331                  | 0.0288674  | Transcription factor KAN4-like [Vitis vinifera]                           |
| B5811                  | 0.04609146 | Ethylene-responsive transcription factor 4 [Zea mays]                     |

doi:10.1371/journal.pone.0164223.t004

**Table 5. Expression abundance of some corm formation-related genes identified previously.** TPM, transcripts per million clean tags.

| Gene ID | Assetion     | TPM-B1 | TPM-B2 | TPM-B3 | TPM-B4 | Function annotation                | References |
|---------|--------------|--------|--------|--------|--------|------------------------------------|------------|
| B15483  | gj 225446176 | 2.97   | 0.46   | 0.01   | 0.01   | zinc finger CONSTANS-like protein  | [15]       |
| B3312   | gj 170280687 | 0.01   | 0.01   | 1.05   | 0.01   | GIGANTEA (clock-regulated protein) | [36]       |
| B12118  | gj 357117348 | 2.29   | 2.29   | 1.88   | 0.57   | MADS-box transcription factor      | [37]       |
| B7616   | gj 157674589 | 1.83   | 0.91   | 2.72   | 0.38   | FRUITFUL-like protein              | [36]       |
| B16198  | gj 357124493 | 10.75  | 9.15   | 6.27   | 1.71   | SFT family                         | [38]       |
| B5152   | gj 15232818  | 0.01   | 0.46   | 0.42   | 0.01   | Cycling Dof Factor                 | [39]       |
| B8880   | gj 359474075 | 0.01   | 0.69   | 0.01   | 0.01   | BEL1-like HD transcription factor  | [40]       |
| B7173   | gj 55741123  | 626.1  | 325    | 198.6  | 3.98   | Sucrose synthase                   | [11]       |
| B1387   | gj 10505183  | 0.01   | 0.01   | 0.01   | 0.38   | Lipoxygenase                       | [41]       |
| B2632   | gj 39777289  | 1.83   | 1.41   | 0.63   | 0.01   | Phytochrome B                      | [42]       |

doi:10.1371/journal.pone.0164223.t005

COG and GO function classification were applied to analyze these expressed genes, and detailed information is shown in S3 and S4 Figs. Some genes relevant to corm formation were found, and some differences in gene expression between tag sequencing analysis and qPCR were identified. This could be explained by differences in sample collection conditions between the

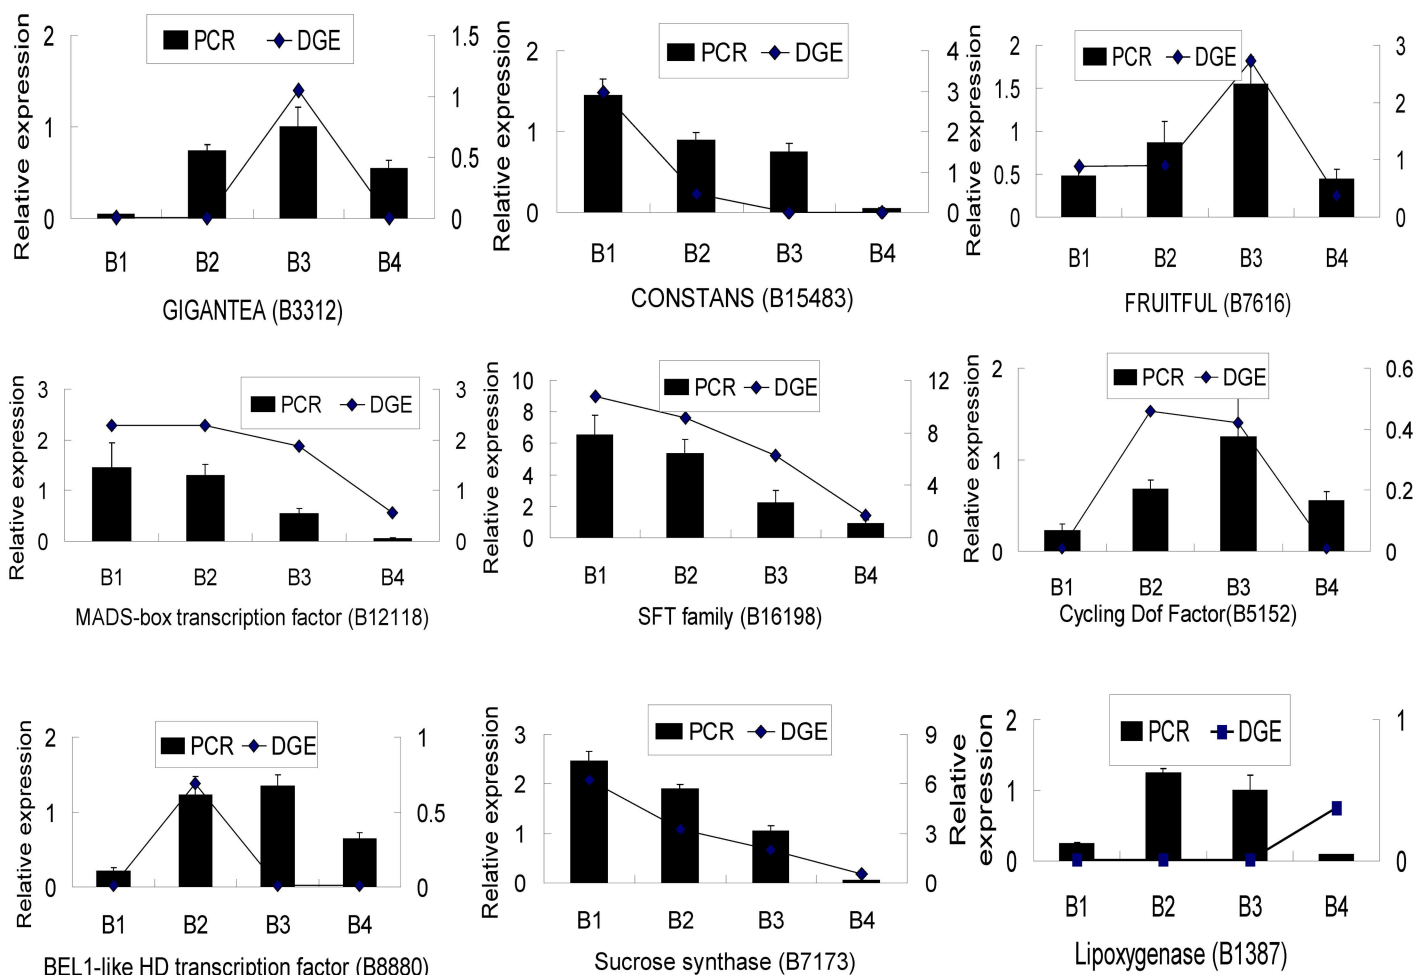

**Fig 3. Validation of tag-mapped genes from the four stages of the Chinese water chestnut by qPCR.**

doi:10.1371/journal.pone.0164223.g003

two methods. Alternatively, differences in the corm development stage may have caused differences in expression profiling. Samples were collected according to corm size and classified into the same developmental stage, although differences in growth periods could cause some corms to be larger or smaller than average. Additionally, RNA-seq focuses on the whole transcriptome, so disturbances of bias during sequencing are difficult to avoid, and gene expression changes are determined according to the number of reads. However, qPCR concentrates on the expression of a specific gene so is more reliable at reflecting gene transcription during plant metabolism.

## Survival in an Anaerobic Environment

The entire growth season of the Chinese water chestnut must be maintained in shallow water, so the plant would be expected to develop molecular mechanisms to adapt to anaerobic conditions. We observed that many genes showed an altered expression profile during corm formation (Fig 2), of which some were related to anaerobic adaptation such as genes encoding alcohol dehydrogenase (B4394), NADH dehydrogenase (B2836), superoxide dismutase (B13999), CDPK (B806), MYB transcription factor (B8501), ethylene responsive transcription factor (B490), and ATPase (B227); these showed increased expression during corm formation (Table 3 and S2 Table). These genes also showed enhanced expression in the lotus root and arrowhead during storage organ formation [10, 44].

Many reports show that plant products and quality are often destroyed by anaerobic environments [45,46,47,48], which can lead to the starvation of people who depend on these crops. Compared with these xerophytes, aquatic plants such as the lotus root, arrowhead, water celery, and Chinese water chestnut show increased adaptations to anaerobic conditions [44,49]. The expression of some key genes, including ethylene responsive factor, alcohol dehydrogenase, *SOD*, and *HSP*, is an essential strategy for plants to survive during storage organ formation [50,51,52,53,54]; therefore, increased transcriptional levels of alcohol dehydrogenase are necessary for aquatic plants to maintain normal growth under anaerobic conditions.

## Hormonal Signal Transduction during Corm Formation

Formation of the storage organ is affected by genetic and environmental factors [11], and hormonal signal transduction is necessary for its development. We found that several ethylene-responsive factors (B0/B1: ethylene-responsive transcription factor 9; B2/B3: ethylene-responsive transcription factor 1A, and ethylene-responsive transcription factor CRF4; B3/B4: ethylene-responsive transcription factor 4, ethylene-responsive transcription factor 5-like, and ERF1 transcription factor) showed enhanced expression during corm formation (Tables 3 and 4), suggesting that the ethylene signal transduction pathway is necessary for corm development in the Chinese water chestnut.

Ethylene is involved in various biological processes [55, 56], and has been suggested to be a promoter of plant growth and development or the anaerobic response [57]. Aside from biotic and abiotic stress, ethylene has many other functions, such as cell division, plant height, and the underground formation of storage organs [58]. Constitutive expression of an AP2 domain class transcription factor previously resulted in increased resistance to abiotic stress in the potato plant, and a transgenic plant showed decreased cell size, plant height, hypocotyl elongation, and fertility [59]. It has also been reported that transgenic plants expressing some AP2 domain class transcription factors have altered flowering times [60]. *WRI1*, a putative AP2 domain class transcription factor, was reported to regulate seed development in *Arabidopsis*, and transgenic plants with this gene have a higher content of seeds and triacylglycerols [61]. The storage content is altered in transgenic rice plants with an AP2 domain class transcription factor because of the control of expression of the waxy gene [62]. In this study, we found that several ethylene-

responsive factors and AP2 domain class transcription factors showed enhanced expression during corm formation, and we believe that expression of AP2 domain class transcription factors is relevant to the development of the Chinese water chestnut storage organ.

There is increasing evidence for GA and JA in storage organ formation. Stolon elongation was previously found to be promoted and storage organ formation inhibited by a high GA content [63]. An increased GA content in transgenic plants with the GA oxidase gene requires a longer duration of short-day photoperiods for storage organ formation, while this formation is accelerated when enzyme activity is decreased [17]. In a dwarf mutant of *Solanum tuberosum* ssp. *Andigena*, storage organ formation occurred during both long and short days because the GA content was decreased. Interestingly, it has also been shown that formation of the storage organ can be affected by conditions of short days when GA biosynthesis is totally inhibited [19]. This evidence indicates that GA plays an important role in storage organ formation, which is directly regulated by the photoperiod. In the present study, expression of the GA 20-oxidase gene (B15737), which is involved in GA biosynthesis, was increased during B1/B2 stages (the stolon stage to the initial stage) (Table 3), suggesting that a high level of GA probably benefited elongation of the stolon.

JA has also been shown to be involved in plant metabolism and the stress response [64, 65]. For example, endogenous JA was identified as a necessary inducer of storage organs in potatoes and yams [66]. Ravnkar et al. (1993) suggested that exogenous JA is involved in garlic bulb formation [67], while Zeas et al. (1997) suggested that JA not only induces the formation of storage organs, but also increases their number. The same phenomenon is also found in *Pterostylis sanguinea*, where the exogenous application of JA promotes tuber formation [68].

Some genes, including MYB, transcription factor bHLH, bZIP, AP2/ERF domain-containing transcription factor, and lipoxygenase, which have previously been demonstrated to promote organ formation [69,70,71,72,73], were increased during corm formation in the present study. We list some genes with a role in storage organ formation [74,75,76,77,78] in Table 5. Overall, the expression profiles of these genes show that corm formation is highly complex and regulated by multiple genes.

## DEGs Involved in the Ca<sup>2+</sup> Signal Transduction Pathway during Corm Formation

We found that three proteins relevant to Ca<sup>2+</sup> signaling, including a calmodulin-like protein (B18064), CaM-binding transcription factor (B40), and a calcium-dependent protein kinase (B2484), showed enhanced expression during corm formation (Tables 2 and 5). Ca<sup>2+</sup> is a second messenger molecule that is involved in many biological processes [79]. Calmodulin perceives the signal when Ca<sup>2+</sup> and CaM are combined (Ca<sup>2+</sup>/CaM), and then modulates the cellular response [80]. Ca<sup>2+</sup>/CaM has also been shown to be closely associated with storage organ formation [81]. In transgenic potato plants, constitutive expression of CaM affects the underground shape and size of tubers [82]. CaM-binding proteins were also reported to be involved in the formation of storage organs [83, 84]. These findings indicate that the Ca<sup>2+</sup> signal transduction pathway is necessary for the development of storage organs. Therefore, the increased expression of calmodulin-like protein, CaM-binding transcription factor, and calcium-dependent protein kinase genes in our present study further demonstrates that Ca<sup>2+</sup> signaling is critical for the formation of storage organs.

## Conclusions

We analyzed gene expression during corm formation in the Chinese water chestnut using high-throughput tag sequencing. In total, 4,371,386, 4,372,602, 4,782,494, and 5,276,540 clean



tags, including 119,676, 110,701, 100,089, and 101,239 distinct tags, were obtained at each stage, respectively (B1: the stolon stage, B2: the initial swelling stage, B3: the middle swelling stage, and B4: the late swelling stage). Of these, 11,592, 10,949, 10,585, and 7,111 genes were annotated from the B1, B2, B3, and B4 stage, respectively, after mapping their functions in existing databases. A number of DEGs were found in the B1/B2, B2/B3, and B3/B4 stages during corm formation, and 10 important storage organ formation genes were also identified. qPCR results were highly correlated with those of tag sequencing analysis.

## Supporting Information

**S1 Fig. Developmental stages of the Chinese water chestnut, including the stolon stage, the initial stage, the middle swelling stage, and the later swelling stage.**

(JPG)

**S2 Fig. Sequencing saturation analysis of four libraries.** B1: stolon stage; B2: initial swelling stage; B3: middle swelling stage; B4: later swelling stage.

(JPG)

**S3 Fig. GOG function classification of genes expressed during corm formation.** All genes identified in the B1/B2, B2/B3, and B3/B4 libraries were classified into 25 classifications according to their function.

(JPG)

**S4 Fig. GO analysis of genes expressed during corm formation.** The percentage and number of genes involved in biological process, cellular component, and molecular function was analyzed using GO Slim Assignment.

(JPG)

**S1 Table. Information on the genes expressed in the B1/B2, B2/B3, and B3/B4 libraries.**

(DOC)

**S2 Table. Primers for genes related to corm formation.**

(XLS)

## Acknowledgments

We thank Edanz Group Ltd for their editorial assistance. We also extend our thanks to members of the Beijing Institute of Genomics for their cooperation in obtaining the high-throughput sequence assembly of the Chinese water chestnut. This work was supported by the Natural Science Foundation of Jiangsu Province, China (BK20151307), the Natural Science Fund for Colleges and Universities in Jiangsu Province, China (14KJB210012), the China Postdoctoral Science Foundation funded project (2013M541738) and Interdisciplinary Subject Fund of Yangzhou University, China (jcxk2015-15), and the Science and Technology Support Project of Jiangsu Province (BE2013388).

## Author Contributions

**Conceptualization:** XC LL LC SL.

**Data curation:** SL.

**Formal analysis:** LC SL YW MY.

**Funding acquisition:** LL LC SL.

**Investigation:** JY SC MY.

**Methodology:** LC LL XC.

**Project administration:** LL XC LC.

**Resources:** LL.

**Supervision:** XC LL.

**Validation:** XC LL LC SL.

**Visualization:** XC LL.

**Writing – original draft:** LC SL.

**Writing – review & editing:** XC LL LC SL.

## References

1. Wu SJ, Yu L (2015) Preparation and characterisation of the oligosaccharides derived from Chinese-water chestnut polysaccharides. *Food Chem.* 181: 15–18. doi: [10.1016/j.foodchem.2015.02.066](https://doi.org/10.1016/j.foodchem.2015.02.066) PMID: [25794714](https://pubmed.ncbi.nlm.nih.gov/25794714/)
2. Tsuchiya T, Iwaki H (1979) Impact of nutrient enrichment in a water chestnut ecosystem at Takahamairi Bay of Lake Kasumigaura, Japan II. Role of water chestnut in primary productivity and nutrient uptake. *Water Air Soil Pollut.* 12:503–510.
3. Tsuchiya T, Iwakuma T (1993) Growth and leaf life-span of a floating leaved plant, *Trapa natans* L., as influenced by nitrogen influx. *Aquat Bot.* 46:317–324.
4. Hummel M, Kiviat E (2004) Review of World Literature on water chestnut with implications for management in North America. *J Aquat Plant Manage.* 42: 17–28.
5. Zhan G, Pan LQ, Mao SB, Zhang W, Wei YY, Tu K (2014) Study on antibacterial properties and major bioactive constituents of Chinese water chestnut (*Eleocharis dulcis*) peels extracts/fractions. *Eur Food Res Technol.* 238: 789–796. doi: [10.1007/s00217-013-2151-2](https://doi.org/10.1007/s00217-013-2151-2)
6. Han SS (1993) Reproductive growth and competitive ecology of arrowhead (*Sagittaria trifolia* L.)-(1)-Growth and tuber formation of arrowhead under several environmental factors. *Korean J of Weed Sci.* 13: 138–150.
7. Paiva E, Lister RM, Park WD (1983) Induction and accumulation of major tuber proteins of potato in stems and petioles. *Plant Physiol.* 71: 161–168. doi: [10.1104/pp.71.1.161](https://doi.org/10.1104/pp.71.1.161) PMID: [16662778](https://pubmed.ncbi.nlm.nih.gov/16662778/)
8. Park WM (1983) Tuber proteins of potato—a new and surprising molecular system. *Plant Mol Biol Rep.* 1: 61–66. doi: [10.1007/BF02680300](https://doi.org/10.1007/BF02680300)
9. Baksh SI, Richards JH (2006) An architectural model for *Eleocharis*: Morphology and development of *Eleocharis cellulosa* (Cyperaceae). *Am J Bot.* 93: 707–715. doi: [10.3732/ajb.93.5.707](https://doi.org/10.3732/ajb.93.5.707) PMID: [21642134](https://pubmed.ncbi.nlm.nih.gov/21642134/)
10. Cheng LB, Li SY, Xu XY, Hussain J, Yin JJ, Zhang Y, et al. (2013) Identification of differentially expressed genes relevant to corm formation in *Sagittaria trifolia*. *Plos ONE.* 8: e54573. doi: [10.1371/journal.pone.0054573](https://doi.org/10.1371/journal.pone.0054573) PMID: [23359383](https://pubmed.ncbi.nlm.nih.gov/23359383/)
11. Fernie AR, Willmitzer L (2001) Molecular and biochemical triggers of potato tuber development. *Plant Physiol.* 127:1459–1465. doi: [10.1104/pp.010764](https://doi.org/10.1104/pp.010764) PMID: [11743089](https://pubmed.ncbi.nlm.nih.gov/11743089/)
12. Shigeya Y, Hisao K, Kunikazu U (1981) Effects of Photoperiodic Treatment on Growth and Propagule Production of Arrowhead, *Sagittaria trifolia* L. *J Weed Sci Technol.* 26: 118–122.
13. Jackson SD (1999) Multiple signaling pathways control tuber induction in potato. *Plant Physiol.* 119: 1–8. doi: [10.1104/pp.119.1.1](https://doi.org/10.1104/pp.119.1.1) PMID: [9880339](https://pubmed.ncbi.nlm.nih.gov/9880339/)
14. Inui H, Ogura Y, Kiyosue T (2010) Overexpression of *Arabidopsis thaliana* LOV KELCH REPEAT PROTEIN 2 promotes tuberization in potato (*Solanum tuberosum* cv. May Queen). *FEBS Lett.* 584:2393–2396. doi: [10.1016/j.febslet.2010.04.031](https://doi.org/10.1016/j.febslet.2010.04.031) PMID: [20399775](https://pubmed.ncbi.nlm.nih.gov/20399775/)
15. Martinez-Garcia JF, Virgos-Soler A, Prat S (2002) Control of photoperiod-regulated tuberization in potato by the *Arabidopsis* flowering-time gene *constans*. *PNAS.* 99: 15211–15216. doi: [10.1073/pnas.222390599](https://doi.org/10.1073/pnas.222390599) PMID: [12393812](https://pubmed.ncbi.nlm.nih.gov/12393812/)
16. Kim WY, Fujiwara S, Suh SS, Kim J, Kim Y, Han L (2007) ZEITLUPE is a circadian photoreceptor stabilized by GIGANTEA in blue light. *Nat.* 449:356–360. doi: [10.1038/nature06132](https://doi.org/10.1038/nature06132) PMID: [17704763](https://pubmed.ncbi.nlm.nih.gov/17704763/)

17. Carrera E, Bou J, Garcia-Martinez JL, Prat S (2000) Changes in GA 20-oxidase gene expression strongly affect stem length, tuber induction and tuber yield of potato plants. *Plant J.* 22: 247–256. doi: [10.1046/j.1365-313x.2000.00736.x](https://doi.org/10.1046/j.1365-313x.2000.00736.x) PMID: [10849342](https://pubmed.ncbi.nlm.nih.gov/10849342/)
18. Inui H, Ogura Y, Kiyosue T (2010) Overexpression of Arabidopsis thaliana LOV KELCH REPEAT PROTEIN 2 promotes tuberization in potato (*Solanum tuberosum* cv. May Queen). *FEBS Lett.* 584:2393–2396. doi: [10.1016/j.febslet.2010.04.031](https://doi.org/10.1016/j.febslet.2010.04.031) PMID: [20399775](https://pubmed.ncbi.nlm.nih.gov/20399775/)
19. Vreugdenhil D, Struik PC (1989) An integrated view of the hormonal regulation of tuber formation in potato (*Solanum tuberosum*). *Physiol Plant.* 75: 525–531. doi: [10.1111/j.1399-3054.1989.tb05619.x](https://doi.org/10.1111/j.1399-3054.1989.tb05619.x)
20. Jasik J, de Klerk GJ (2006) Effect of methyl jasmonate on morphology and dormancy development in lily bulblets regenerated in vitro. *J Plant Growth Regul.* 25: 45–51. doi: [10.1007/s00344-005-0048-4](https://doi.org/10.1007/s00344-005-0048-4)
21. Kim KJ, Kim KS (2005) Changes of endogenous growth substances during bulb maturation after flowering in *Lilium* oriental hybrid 'Casa Blanca'. *Acta Hort.* 570: 661–667.
22. Usha PR, Rajasekaran RL, Claude DC, Samuel KA, Kevin JS (2011) Role of ethylene and jasmonic acid on rhizome induction and growth in rhubarb (*Rheum rhabarbarum* L.). *Plant Cell Tiss Organ Cult.* 105:253–263.
23. Mingo-Castel AM, Smith OE, Kumamoto J (1976) Studies on the carbon dioxide promotion and ethylene inhibition of tuberization in potato explants cultured in vitro. *Plant Physiol.* 57: 480–485. PMID: [16659510](https://pubmed.ncbi.nlm.nih.gov/16659510/)
24. Usha PR, Rajasekaran RL, Claude DC, Samuel KA, Kevin JS (2011) Role of ethylene and jasmonic acid on rhizome induction and growth in rhubarb (*Rheum rhabarbarum* L.). *Plant Cell Tiss Organ Cult.* 105:253–263.
25. Abeles FB, Morgan PW, Saltveit ME Jr (1992) *Ethylene in Plant Biology*. San Diego: Academic Press.
26. Neuteboom CE, Lada RL, Caldwell CD, Eaton L, Havard P (2001) Ethephon and spermidine enhance bulking in dicer carrots (*Daucus carota* var. *sativus*). *PGRSAQ.* 30: 77.
27. Sembdner G, Parthier B (1993) The biochemistry and the physiological and molecular actions of jasmonates. *Annu. Rev. Plant Physiol.* 44: 569–589. doi: [10.1146/annurev.pp.44.060193.003033](https://doi.org/10.1146/annurev.pp.44.060193.003033)
28. Koda Y (1992) The role of jasmonic acid and related compounds in the regulation of plant development. *Int Rev Cytol.* 135:155–199. PMID: [1618607](https://pubmed.ncbi.nlm.nih.gov/1618607/)
29. Ravnkar M, Zel J, Plaper I, Spacapan A (1993) Jasmonic Acid Stimulates Shoot and Bulb Formation of Garlic In Vitro. *J Plant Growth Regul.* 12:73–77. doi: [10.1007/BF00193236](https://doi.org/10.1007/BF00193236)
30. Wang QQ, Liu F, Chen XS, Ma XJ, Zeng HQ, Yang ZM (2010) Transcriptome profiling of early developing cotton fiber by deep-sequencing reveals significantly differential expression of genes in a fuzzless/lintless mutant. *Genomics.* 96: 369–376. doi: [10.1016/j.ygeno.2010.08.009](https://doi.org/10.1016/j.ygeno.2010.08.009) PMID: [20828606](https://pubmed.ncbi.nlm.nih.gov/20828606/)
31. Mach J (2011) Unpureeing the tomato layers of information revealed by microdissection and high-throughput transcriptome sequencing. *Plant Cell.* doi: [10.1105/tpc.111.231111](https://doi.org/10.1105/tpc.111.231111) PMID: [22076842](https://pubmed.ncbi.nlm.nih.gov/22076842/)
32. Wang FD, Li LB, Li HY, Liu LF, Zhang YH, Gao JW (2012) Transcriptome analysis of rosette and folding leaves in Chinese cabbage using high-throughput RNA sequencing. *Genomics.* doi: [10.1016/j.ygeno.2012.02.005](https://doi.org/10.1016/j.ygeno.2012.02.005) PMID: [22387604](https://pubmed.ncbi.nlm.nih.gov/22387604/)
33. Qi XH, Xu XW, Lin XJ, Zhang WJ, Chen XH (2011) Identification of differentially expressed genes in cucumber (*Cucumis sativus* L.) root under waterlogging stress by digital gene expression profile. *Genomics.* doi: [10.1016/j.ygeno.2011.12.008](https://doi.org/10.1016/j.ygeno.2011.12.008) PMID: [22240004](https://pubmed.ncbi.nlm.nih.gov/22240004/)
34. Mach J (2011) Unpureeing the tomato layers of information revealed by microdissection and high-throughput transcriptome sequencing. *Plant Cell.* doi: [10.1105/tpc.111.231111](https://doi.org/10.1105/tpc.111.231111) PMID: [22076842](https://pubmed.ncbi.nlm.nih.gov/22076842/)
35. Grabherr MG, Haas BJ, Yassour M, Levin JZ, Thompson DA, Amit I, et al. (2011). "Full-length transcriptome assembly from RNA-Seq data without a reference genome." *Nat biotech.* 29: 644–52. doi: [10.1038/nbt.1883](https://doi.org/10.1038/nbt.1883) PMID: [21572440](https://pubmed.ncbi.nlm.nih.gov/21572440/)
36. Abelenda JA, Navarro C, Prat S (2011). From the model to the crop: genes controlling tuber formation in potato. *Cur Opin in Biotech* 22: 287–292. doi: [10.1016/j.copbio.2010.11.013](https://doi.org/10.1016/j.copbio.2010.11.013) PMID: [21168321](https://pubmed.ncbi.nlm.nih.gov/21168321/)
37. Hannapel DJ, Miller J C, Park WD (1985) Regulation of Potato Tuber Protein Accumulation by Gibberellic Acid. *Plant Physiol* 78: 700–703. PMID: [16664311](https://pubmed.ncbi.nlm.nih.gov/16664311/)
38. Krieger U, Lippman ZB, Zamir D (2010) The flowering gene single flower truss drives heterosis for yield in tomato. *Nat Genet* 42: 459–463. doi: [10.1038/ng.550](https://doi.org/10.1038/ng.550) PMID: [20348958](https://pubmed.ncbi.nlm.nih.gov/20348958/)
39. Imaizumi T, Kay SA (2006) Photoperiodic control of flowering: not only by coincidence. *Trends in Plant Sci* 11: 550–558. doi: [10.1016/j.tplants.2006.09.004](https://doi.org/10.1016/j.tplants.2006.09.004) PMID: [17035069](https://pubmed.ncbi.nlm.nih.gov/17035069/)
40. Banerjee AK, Chatterjee M, Yu Y, Suh SG, Miller WA, Hannapel DJ (2006). Dynamics of a mobile RNA of potato involved in a long distance signaling pathway. *Plant Cell* 18: 3443–3457. doi: [10.1105/tpc.106.042473](https://doi.org/10.1105/tpc.106.042473) PMID: [17189340](https://pubmed.ncbi.nlm.nih.gov/17189340/)

41. Kolomiets MV, Hannapel DJ, Chen H, Tymeson M, Gladon RJ (2001) Lipoxygenase is involved in the control of potato tuber development. *Plant Cell* 13: 613–626. doi: [10.1105/tpc.13.3.613](https://doi.org/10.1105/tpc.13.3.613) PMID: [11251100](https://pubmed.ncbi.nlm.nih.gov/11251100/)
42. Jackson SD, Heyer A, Dietze J, Prat S (1996) Phytochrome B mediates the photoperiodic control of tuber formation in potato. *Plant J.* 9: 159–166. doi: [10.1046/j.1365-313X.1996.09020159.x](https://doi.org/10.1046/j.1365-313X.1996.09020159.x)
43. Wu T, Qin ZW, Zhou XY, Feng Z, Du YL (2010) Transcriptome profile analysis of floral sex determination in cucumber. *J Plant Physiol.* 167: 905–913. doi: [10.1016/j.jplph.2010.02.004](https://doi.org/10.1016/j.jplph.2010.02.004) PMID: [20303197](https://pubmed.ncbi.nlm.nih.gov/20303197/)
44. Cheng LB, Li SY, Yin JJ, Li LJ, Chen XH (2013) Genome-wide analysis of differentially expressed genes relevant to rhizome formation in lotus root (*Nelumbo Nucifera Gaertn.*). *Plos ONE.* 8: e67116. doi: [10.1371/journal.pone.0067116](https://doi.org/10.1371/journal.pone.0067116) PMID: [23840598](https://pubmed.ncbi.nlm.nih.gov/23840598/)
45. Perata P, Alpi A (1993) Plant responses to anaerobiosis. *Plant Sci.* 93: 1–7. doi: [10.1016/0168-9452\(93\)90029-Y](https://doi.org/10.1016/0168-9452(93)90029-Y)
46. Subbaiah CC, Zhang J, Sachs MM (1994) Involvement of intracellular calcium in anaerobic gene expression and survival of maize seedling. *Plant Physiol.* 105: 369–376. PMID: [7518090](https://pubmed.ncbi.nlm.nih.gov/7518090/)
47. Vartapetian BB, Jackson MB (1997) Plant adaptations to anaerobic stress. *Ann Bot.* 79: 3–30. doi: [10.1093/oxfordjournals.aob.a010303](https://doi.org/10.1093/oxfordjournals.aob.a010303)
48. Ishizawa A, Murakami S, Kawakami Y, Kuramochi H (1999) Growth and energy status of arrowhead tubers, pondweed turions and rice seedling under anoxic conditions. *Plant Cell Environ.* 22: 505–514.
49. Crawford RMM, Braendle R (1996) Oxygen deprivation stress in a changing environment. *J Exp Bot.* 47: 145–159. doi: [10.1093/jxb/47.2.145](https://doi.org/10.1093/jxb/47.2.145)
50. Jung SH, Lee JY, Lee DH (2003) Use of SAGE technology to reveal changes in gene expression in *Arabidopsis* leaves undergoing cold stress. *Plant Mol Biol.* 52:553–567. PMID: [12956526](https://pubmed.ncbi.nlm.nih.gov/12956526/)
51. Shiao TL, Ellis MH, Dolferus R, Dennis ES, Doran PM (2002) Overexpression of alcohol dehydrogenase or pyruvate decarboxylase improves growth of hairy roots at reduced oxygen concentrations. *Bio-technol Bioeng.* 77:455–461. doi: [10.1002/bit.10147](https://doi.org/10.1002/bit.10147) PMID: [11787018](https://pubmed.ncbi.nlm.nih.gov/11787018/)
52. Baxter-Burrell A, Chang R, Springer P, Bailey-Serres J (2003) Gene and enhancer trap transposable elements reveal oxygen deprivation-regulated genes and their complex patterns of expression in *Arabidopsis*. *Ann Bot.* 91:129–41. PMID: [12509334](https://pubmed.ncbi.nlm.nih.gov/12509334/)
53. Xie ZD, Li DM, Wang LJ, Sack FD, Grotewold E (2010) Role of the stomatal development regulators FLP/MYB88 in abiotic stress responses. *Plant J.* 64: 731–739. doi: [10.1111/j.1365-313X.2010.04364.x](https://doi.org/10.1111/j.1365-313X.2010.04364.x) PMID: [21105921](https://pubmed.ncbi.nlm.nih.gov/21105921/)
54. Hoeren FU, Dolferus R, Wu Y, Peacock WJ, Dennis ES (1998) Evidence for a role for AtMYB2 in the induction of the *Arabidopsis* alcohol dehydrogenase gene (ADH1) by low oxygen. *Genetics.* 149:479–490. PMID: [9611167](https://pubmed.ncbi.nlm.nih.gov/9611167/)
55. Grichko VP, Glick BR (2001) Ethylene and flooding stress in plants. *Plant Physiol. Biochem.* 39: 1–9. doi: [10.1016/S0981-9428\(00\)01213-4](https://doi.org/10.1016/S0981-9428(00)01213-4)
56. Suge H, Kusanagi T (1975) Ethylene and carbon dioxide: regulation of growth in two perennial aquatic plants, arrowhead and pondweed. *Plant and Cell Physiol.* 16: 65–72.
57. Jackson MB (2008) Ethylene-promoted Elongation: an Adaptation to Submergence Stress. *Ann. Bot.* 101: 229–248. doi: [10.1093/aob/mcm237](https://doi.org/10.1093/aob/mcm237) PMID: [17956854](https://pubmed.ncbi.nlm.nih.gov/17956854/)
58. Suge H, Kusanagi T (1975) Ethylene and carbon dioxide: regulation of growth in two perennial aquatic plants, arrowhead and pondweed. *Plant Cell Physiol.* 16, 65–72.
59. Dietz KJ, Vogel MO, Viehhauser A (2010) AP2/EREBP transcription factors are part of gene regulatory networks and integrate metabolic, hormonal and environmental signals in stress acclimation and retrograde signaling. *Protoplasma.* 245: 3–14. doi: [10.1007/s00709-010-0142-8](https://doi.org/10.1007/s00709-010-0142-8) PMID: [20411284](https://pubmed.ncbi.nlm.nih.gov/20411284/)
60. Feng JX, Liu D, Pan Y, Gong W, Ma LG, Luo JC (2005). An annotation update via cDNA sequence analysis and comprehensive profiling of developmental, hormonal or environmental responsiveness of the *Arabidopsis* AP2/EREBP transcription factor gene family. *Plant Mol Biol.* 59:853–868. doi: [10.1007/s11103-005-1511-0](https://doi.org/10.1007/s11103-005-1511-0) PMID: [16307362](https://pubmed.ncbi.nlm.nih.gov/16307362/)
61. Cernac A, Benning C (2004) WRINKLED1 encodes an AP2/EREB domain protein involved in the control of compound biosynthesis in *Arabidopsis*. *Plant J.* 40: 575–585. doi: [10.1111/j.1365-313X.2004.02235.x](https://doi.org/10.1111/j.1365-313X.2004.02235.x) PMID: [15500472](https://pubmed.ncbi.nlm.nih.gov/15500472/)
62. Zhu Y, Cai XL, Wang ZY, Hong MM (2003) An interaction between a MYC protein and an EREBP protein is involved in transcriptional regulation of the rice Wax gene. *J Biol Chem.* 278:47803–47811. doi: [10.1074/jbc.M302806200](https://doi.org/10.1074/jbc.M302806200) PMID: [12947109](https://pubmed.ncbi.nlm.nih.gov/12947109/)
63. Xu X, van Lammeren AAM, Vermeer E, Vreugdenhil D (1998) The role of gibberellin, abscisic acid, and sucrose in the regulation of potato tuber formation *in vitro*. *Plant Physiol.* 117: 575–584. doi: [10.1104/pp.117.2.575](https://doi.org/10.1104/pp.117.2.575) PMID: [9625710](https://pubmed.ncbi.nlm.nih.gov/9625710/)

64. Sembdner G, and Parthier B (1993) The biochemistry and the physiological and molecular actions of jasmonates. *Annu. Rev. Plant Physiol.* 44: 569–589. doi: [10.1146/annurev.pp.44.060193.003033](https://doi.org/10.1146/annurev.pp.44.060193.003033)
65. Creelman RA, Mullet JE (1997) Biosynthesis and action of jasmonates in plants. *Annu Rev Plant Physiol.* 48: 355–381. doi: [10.1146/annurev.arplant.48.1.355](https://doi.org/10.1146/annurev.arplant.48.1.355)
66. Koda Y (1992) The role of jasmonic acid and related compounds in the regulation of plant development. *Int Rev Cytol.* 135:155–199. PMID: [1618607](https://pubmed.ncbi.nlm.nih.gov/1618607/)
67. Ravnkar M, Zel J, Plaper I, Spacapan A (1993) Jasmonic acid stimulates shoot and bulb formation of garlic in vitro. *J Plant Growth Regul.* 12:73–77. doi: [10.1007/BF00193236](https://doi.org/10.1007/BF00193236)
68. Debeljak N, Regvar M, Dixon KW, Sivasithamparam K (2002) Induction of tuberisation in vitro with jasmonic acid and sucrose in an Australian terrestrial orchid, *Pterostylis sanguinea*. *Plant Growth Regul.* 36: 253–260.
69. Lee MW, Qi M, Yang Y (2001) A novel jasmonic acid-inducible rice myb gene associates with fungal infection and host cell death. *Mol Plant Microbe Interact.* 14:527–35. doi: [10.1094/MPMI.2001.14.4.527](https://doi.org/10.1094/MPMI.2001.14.4.527) PMID: [11310740](https://pubmed.ncbi.nlm.nih.gov/11310740/)
70. Fernández-Calvo P, Chini A, Fernández-Barbero G, Chico JM, Gimenez-Ibanez S, Geerinck J (2011) The Arabidopsis bHLH transcription factors MYC3 and MYC4 are targets of JAZ repressors and act additively with MYC2 in the activation of jasmonate responses. *Plant Cell.* 3:701–15. doi: [10.1105/tpc.110.080788](https://doi.org/10.1105/tpc.110.080788) PMID: [21335373](https://pubmed.ncbi.nlm.nih.gov/21335373/)
71. Meng XB, Zhao WS, Lin RM, Wang M, Peng YL (2005) Identification of a novel rice bZIP-type transcription factor gene, OsbZIP1, involved in response to infection of *Magnaporthe grisea*. *Plant Mol Biol Rep.* 23: 301–302.
72. Zhang HW, Lu XY, Huang DF, Huang RF (2004) The ethylene-, jasmonate-, abscisic acid and NaCl-responsive tomato transcription factor JERF1 modulates expression of GCC box-containing genes and salt tolerance in tobacco. *Planta.* 220: 262–270. doi: [10.1007/s00425-004-1347-x](https://doi.org/10.1007/s00425-004-1347-x) PMID: [15300440](https://pubmed.ncbi.nlm.nih.gov/15300440/)
73. Mueller MJ (1997) Enzymes involved in jasmonic acid biosynthesis. *Physiol Plant.* 100: 653–663. doi: [10.1111/j.1399-3054.1997.tb03072.x](https://doi.org/10.1111/j.1399-3054.1997.tb03072.x)
74. Müller-Röber B, Sonnewald U, Willmitzer L (1992) Inhibition of the ADP-glucose pyrophosphorylase in transgenic potatoes leads to sugar-storing tubers and influences tuber formation and expression of tuber protein genes. *EMBO J.* 11: 1229–1238. PMID: [1373373](https://pubmed.ncbi.nlm.nih.gov/1373373/)
75. Kuipers AGJ, Jacobsen E, Visser RGF (1994) Formation and deposition of amylose in the potato tuber starch granule are affected by the reduction of granule-bound starch synthase gene expression. *Plant Cell.* 6: 43–52. doi: [10.1105/tpc.6.1.43](https://doi.org/10.1105/tpc.6.1.43) PMID: [12244219](https://pubmed.ncbi.nlm.nih.gov/12244219/)
76. Carrera E, Bou J, García-Martínez JL, Prat S (2000) Changes in GA 20-oxidase gene expression strongly affect stem length, tuber induction and tuber yield of potato plants. *Plant J.* 22: 247–256. doi: [10.1046/j.1365-3113x.2000.00736.x](https://doi.org/10.1046/j.1365-3113x.2000.00736.x) PMID: [10849342](https://pubmed.ncbi.nlm.nih.gov/10849342/)
77. Zeevaart JAD (2008) Leaf-produced floral signals. *Cur Opin Plant Biol.* 11:541–547. doi: [10.1016/j.pbi.2008.06.009](https://doi.org/10.1016/j.pbi.2008.06.009) PMID: [18691931](https://pubmed.ncbi.nlm.nih.gov/18691931/)
78. Baudry A, Ito S, Song YH, Strait AA, Kiba T, Lu S (2010) F-box proteins FKF1 and LKP2 act in concert with ZEITLUPE to control arabidopsis clock progression. *Plant Cell.* 22: 606–622. doi: [10.1105/tpc.109.072843](https://doi.org/10.1105/tpc.109.072843) PMID: [20354196](https://pubmed.ncbi.nlm.nih.gov/20354196/)
79. Kim MC, Chung WS, Yun DJ, Cho MJ (2009) Calcium and calmodulin-mediated regulation of gene expression in plants. *Mol Plant.* 2: 13–21. doi: [10.1093/mp/ssn091](https://doi.org/10.1093/mp/ssn091) PMID: [19529824](https://pubmed.ncbi.nlm.nih.gov/19529824/)
80. Hoefflich KP, Ikura M (2002) Calmodulin in action: diversity in target recognition and activation mechanisms. *Cell.* 108: 739–742. doi: [10.1016/S0092-8674\(02\)00682-7](https://doi.org/10.1016/S0092-8674(02)00682-7) PMID: [11955428](https://pubmed.ncbi.nlm.nih.gov/11955428/)
81. Balamani V, Veluthambi K, Poovaiah BW (1986) Effect of calcium on tuberization in potato (*Solanum tuberosum* L.). *Plant Physiol.* 80: 856–858. doi: [10.1104/pp.80.4.856](https://doi.org/10.1104/pp.80.4.856) PMID: [16664731](https://pubmed.ncbi.nlm.nih.gov/16664731/)
82. Poovaiah BW, Takezawa D, An G, Han TJ (1996) Regulated expression of a calmodulin isoform alters growth and development in potato. *J Plant Physiol.* 149: 553–558. doi: [10.1016/S0176-1617\(96\)80333-6](https://doi.org/10.1016/S0176-1617(96)80333-6) PMID: [11540589](https://pubmed.ncbi.nlm.nih.gov/11540589/)
83. Bouche N, Scharlat A, Snedden W, Bouchez D, Fromm H (2002) A novel family of calmodulin-binding transcription activators in multicellular organisms. *J Biol Chem.* 277: 21851–21861. doi: [10.1074/jbc.M200268200](https://doi.org/10.1074/jbc.M200268200) PMID: [11925432](https://pubmed.ncbi.nlm.nih.gov/11925432/)
84. Reddy ASN, Safadi F, Narasimhulu SB, Golovkin M, Hu X (1996) Isolation of a novel calmodulin-binding protein from *Arabidopsis thaliana*. *J Biol Chem.* 271: 7052–7060.
